# Supplementary material
Source: ML conference proceedings conference paper supplement (https://proceedings.mlr.press/v97/hsieh19a.html)
Supplement: Supplementary file 1 [file hsieh19a-supp.pdf]

---

## Supplementary Material: Stay With Me: Lifetime Maximization Through Heteroscedastic Linear Bandits With Reneging

---

### A. Appendix

#### A.1. Proof of Lemma 2

*Proof.* Recall that  $V_n = (\mathbf{X}_n^\top \mathbf{X}_n + \lambda I_d)$ . Note that

$$\hat{\phi}_n = (\mathbf{X}_n^\top \mathbf{X}_n + \lambda I_d)^{-1} \mathbf{X}_n^\top f^{-1}(\hat{\varepsilon} \circ \hat{\varepsilon}) \quad (39)$$

$$= V_n^{-1} \mathbf{X}_n^\top f^{-1}(\hat{\varepsilon} \circ \hat{\varepsilon}) \quad (40)$$

$$= V_n^{-1} \mathbf{X}_n^\top (f^{-1}(\hat{\varepsilon} \circ \hat{\varepsilon}) - \mathbf{X}_n \phi_* + \mathbf{X}_n \phi_*) \quad (41)$$

$$+ \lambda V_n^{-1} \phi_* - \lambda V_n^{-1} \phi_* \quad (42)$$

$$= V_n^{-1} \mathbf{X}_n^\top (f^{-1}(\hat{\varepsilon} \circ \hat{\varepsilon}) - \mathbf{X}_n \phi_*) - \lambda V_n^{-1} \phi_* + \phi_*. \quad (43)$$

Therefore, for any  $x \in \mathbb{R}^d$ , we know

$$|x^\top \hat{\phi}_n - x^\top \hat{\phi}_*| \quad (44)$$

$$= |x^\top V_n^{-1} \mathbf{X}_n^\top (f^{-1}(\hat{\varepsilon} \circ \hat{\varepsilon}) - \mathbf{X}_n \phi_*) - \lambda x^\top V_n^{-1} \phi_*| \quad (45)$$

$$\leq \|x\|_{V_n^{-1}} \left( \lambda \|\phi_*\|_{V_n^{-1}} \quad (46)$$

$$+ \|\mathbf{X}_n^\top (f^{-1}(\hat{\varepsilon} \circ \hat{\varepsilon}) - \mathbf{X}_n \phi_*)\|_{V_n^{-1}} \right). \quad (47)$$

Moreover, by rewriting  $\hat{\varepsilon} = \hat{\varepsilon} - \varepsilon + \varepsilon$ , we have

$$f^{-1}(\hat{\varepsilon} \circ \hat{\varepsilon}) \quad (48)$$

$$= f^{-1}((\hat{\varepsilon} - \varepsilon + \varepsilon) \circ (\hat{\varepsilon} - \varepsilon + \varepsilon)) \quad (49)$$

$$= f^{-1}(\varepsilon \circ \varepsilon) + M_f^{-1} \left( 2(\varepsilon \circ \mathbf{X}_n(\theta_* - \hat{\theta}_n)) \quad (50)$$

$$+ (\mathbf{X}_n(\theta_* - \hat{\theta}_n) \circ \mathbf{X}_n(\theta_* - \hat{\theta}_n)) \right), \quad (51)$$

where (50)-(51) follow from the fact that both  $f(\cdot)$  and  $f^{-1}(\cdot)$  are linear with a slope  $M_f$  and  $M_f^{-1}$ , respectively, as described in Section 3. Therefore, by (44)-(51) and the Cauchy-Schwarz inequality, we have

$$|x^\top \hat{\phi}_n - x^\top \hat{\phi}_*| \leq \|x\|_{V_n^{-1}} \left\{ \lambda \|\phi_*\|_{V_n^{-1}} \quad (52)$$

$$+ \|\mathbf{X}_n^\top (f^{-1}(\varepsilon \circ \varepsilon) - \mathbf{X}_n \phi_*)\|_{V_n^{-1}} \quad (53)$$

$$+ 2M_f^{-1} \left\| \mathbf{X}_n^\top (\varepsilon \circ \mathbf{X}_n(\theta_* - \hat{\theta}_n)) \right\|_{V_n^{-1}} \quad (54)$$

$$+ M_f^{-1} \left\| \mathbf{X}_n^\top (\mathbf{X}_n(\theta_* - \hat{\theta}_n) \circ \mathbf{X}_n(\theta_* - \hat{\theta}_n)) \right\|_{V_n^{-1}} \right\}. \quad (55)$$

□

#### A.2. Proof of Lemma 3

We first introduce the following useful lemmas.

**Lemma A.1 (Lemma 8.2 in (Erdős et al., 2012))** *Let  $\{a_i\}_{i=1}^N$  be  $N$  independent random complex variables with zero mean and variance  $\sigma^2$  and having uniform sub-exponential decay, i.e., there exists  $\kappa_1, \kappa_2 > 0$  such that*

$$\mathbb{P}\{|a_i| \geq x^{\kappa_1}\} \leq \kappa_2 e^{-x}. \quad (56)$$

*We use  $a^H$  to denote the conjugate transpose of  $a$ . Let  $a = (a_1, \dots, a_N)^\top$ , let  $\bar{a}_i$  denote the complex conjugate of  $a_i$ , for all  $i$ , and let  $\mathbf{B} = (B_{ij})$  be a complex  $N \times N$  matrix. Then, we have*

$$\mathbb{P}\left\{|a^H \mathbf{B} a - \sigma^2 \text{tr}(\mathbf{B})| \geq s \sigma^2 \left( \sum_{i=1}^N |B_{ii}|^2 \right)^{-1/2}\right\} \quad (57)$$

$$\leq C_1 \exp\left(-C_2 \cdot s^{1/(1+\kappa_1)}\right), \quad (58)$$

*where  $C_1$  and  $C_2$  are positive constants that depend only on  $\kappa_1, \kappa_2$ . Moreover, for the standard  $\chi_1^2$ -distribution,  $\kappa_1 = 1$  and  $\kappa_2 = 2$ .*

For any  $p \times q$  matrix  $\mathbf{A}$ , we define the induced matrix norm as  $\|\mathbf{A}\|_2 := \max_{v \in \mathbb{R}^q, \|v\|_2=1} \|\mathbf{A}v\|_2$ .

#### Lemma A.2

$$\left\| V_n^{-1/2} \mathbf{X}^\top \right\|_2 \leq 1, \forall n \in \mathbb{N}. \quad (59)$$

*Proof.* By the definition of induced matrix norm,

$$\left\| V_n^{-1/2} \mathbf{X}^\top \right\|_2 = \max_{\|v\|_2=1} \sqrt{v^\top \mathbf{X} V_n^{-1} \mathbf{X}^\top v} \quad (60)$$

$$= \lambda_{\max}(\mathbf{X} V_n^{-1} \mathbf{X}^\top) \quad (61)$$

$$= \lambda_{\max}(\mathbf{X} (\mathbf{X}^\top \mathbf{X} + \lambda I_d)^{-1} \mathbf{X}^\top) \quad (62)$$

$$\leq \frac{\lambda_{\max}(\mathbf{X}^\top \mathbf{X})}{\lambda_{\max}(\mathbf{X}^\top \mathbf{X}) + \lambda} \leq 1, \quad (63)$$

where (63) follows from the singular value decomposition and  $\lambda_{\max}(\mathbf{X}^\top \mathbf{X}) \geq 0$ . □

To simplify notation, we use  $\mathbf{X}$  and  $\mathbf{V}$  as a shorthand for  $\mathbf{X}_n$  and  $\mathbf{V}_n$ , respectively. For convenience, we rewrite  $\mathbf{V}^{-1/2}\mathbf{X}^\top = [v_1 \cdots v_n]$  as the matrix of  $n$  column vectors  $\{v_i\}_{i=1}^n$  (each  $v_i \in \mathbb{R}^d$ ) and show the following property.

**Lemma A.3** *Let  $v_i \in \mathbb{R}^d$  be the  $i$ -th column of the matrix  $\mathbf{V}^{-1/2}\mathbf{X}^\top$ , for all  $1 \leq i \leq n$ . Then, we have*

$$\sum_{i=1}^n \|v_i\|_2^2 \leq d. \quad (64)$$

*Proof of Lemma A.3.* Recall that  $\lambda_{\max}(\cdot)$  denotes the largest eigenvalue of a square matrix. We know

$$\sum_{i=1}^n \|v_i\|_2^2 = \text{tr}\left((\mathbf{X}\mathbf{V}^{-1/2})(\mathbf{V}^{-1/2}\mathbf{X}^\top)\right) \quad (65)$$

$$= \text{tr}\left((\mathbf{V}^{-1/2}\mathbf{X})(\mathbf{X}^\top\mathbf{V}^{-1/2})\right) \quad (66)$$

$$\leq d \cdot \lambda_{\max}\left((\mathbf{V}^{-1/2}\mathbf{X})(\mathbf{X}^\top\mathbf{V}^{-1/2})\right), \quad (67)$$

where (66) follows from the trace of a product being commutative, and (67) follows since the trace is the sum of all eigenvalues. Moreover, we have

$$\lambda_{\max}\left((\mathbf{X}\mathbf{V}^{1/2})(\mathbf{X}^\top\mathbf{V}^{-1/2})\right) \quad (68)$$

$$= \left\|(\mathbf{X}\mathbf{V}^{1/2})(\mathbf{X}^\top\mathbf{V}^{-1/2})\right\|_2 \quad (69)$$

$$\leq \left\|(\mathbf{X}\mathbf{V}^{1/2})\right\|_2 \left\|(\mathbf{X}^\top\mathbf{V}^{-1/2})\right\|_2 \leq 1, \quad (70)$$

where (70) follows from the fact that the  $\ell_2$ -norm is sub-multiplicative. Therefore, by (65)-(70), we conclude that  $\sum_{i=1}^n \|v_i\|_2^2 \leq d$ .  $\square$

We are now ready to prove Lemma 3.

*Proof of Lemma 3.* To simplify notation, we use  $\mathbf{X}$  and  $\mathbf{V}$  as a shorthand for  $\mathbf{X}_n$  and  $\mathbf{V}_n$ , respectively. To begin with, we know  $f^{-1}(\varepsilon \circ \varepsilon) - \mathbf{X}\phi_* = \frac{1}{M_f}((\varepsilon \circ \varepsilon) - f(\mathbf{X}\phi_*))$ . Therefore, we have

$$\left\|\mathbf{X}(f^{-1}(\varepsilon \circ \varepsilon) - \mathbf{X}\phi_*)\right\|_{\mathbf{V}^{-1}} \quad (71)$$

$$= \frac{1}{M_f} \sqrt{(\varepsilon \circ \varepsilon - f(\mathbf{X}\phi_*))^\top \mathbf{X}\mathbf{V}^{-1}\mathbf{X}^\top (\varepsilon \circ \varepsilon - f(\mathbf{X}\phi_*))}, \quad (72)$$

where each element in the vector  $(\varepsilon \circ \varepsilon - f(\mathbf{X}\phi_*))$  is a centered  $\chi_1^2$ -distribution with a scaling of  $f(\phi_*^\top x_i)$ . Defining

$\mathbf{W} = \text{diag}(f(x_1^\top \phi_*), \dots, f(x_n^\top \phi_*))$ , we have

$$\left\|\mathbf{X}(f^{-1}(\varepsilon \circ \varepsilon) - \mathbf{X}\phi_*)\right\|_{\mathbf{V}^{-1}} \quad (73)$$

$$= \frac{1}{M_f} \underbrace{\left[ (\varepsilon \circ \varepsilon - f(\mathbf{X}\phi_*))^\top \mathbf{W}^{-1} (\mathbf{W}\mathbf{X}\mathbf{V}^{-1}\mathbf{X}^\top\mathbf{W}) \right]}_{\text{mean}=0, \text{variance}=2} \quad (74)$$

$$\underbrace{\left[ \mathbf{W}^{-1} (\varepsilon \circ \varepsilon - f(\mathbf{X}\phi_*)) \right]}_{\text{mean}=0, \text{variance}=2}^{1/2}. \quad (75)$$

We use  $\eta = \mathbf{W}^{-1}(\varepsilon \circ \varepsilon - f(\mathbf{X}\phi_*))$  as a shorthand and define  $\mathbf{U} = (U_{ij}) = \mathbf{W}\mathbf{X}\mathbf{V}^{-1}\mathbf{X}^\top\mathbf{W}$ . By Lemma A.1 and the fact that  $\varepsilon(x_1), \dots, \varepsilon(x_n)$  are mutually independent given the contexts  $\{x_i\}_{i=1}^n$ , we have

$$\mathbb{P}\left\{|\eta^\top \mathbf{U}\eta - 2 \cdot \text{tr}(\mathbf{U})| \geq 2s \left(\sum_{i=1}^n |U_{ii}|^2\right)^{1/2}\right\} \quad (76)$$

$$\leq C_1 \exp(-C_2 \sqrt{s}). \quad (77)$$

Recall that  $\mathbf{V}^{-1/2}\mathbf{X}^\top = [v_1 \cdots v_n]$ . The trace of  $\mathbf{U}$  can be upper bounded as

$$\text{tr}(\mathbf{U}) = \text{tr}(\mathbf{W}\mathbf{X}\mathbf{V}^{-1}\mathbf{X}^\top\mathbf{W}) \quad (78)$$

$$= \text{tr}\left(\mathbf{V}^{-1/2}\mathbf{X}^\top\mathbf{W}\mathbf{W}\mathbf{X}\mathbf{V}^{-1/2}\right) \quad (79)$$

$$= \sum_{i=1}^n f(x_i^\top \phi_*)^2 \cdot \|v_i\|_2^2 \quad (80)$$

$$\leq (\sigma_{\max}^2)^2 \sum_{i=1}^n \|v_i\|_2^2 \leq (\sigma_{\max}^2)^2 d, \quad (81)$$

where the last inequality in (81) follows directly from Lemma A.3. Also by the commutative property of the trace operation, we have

$$\sum_{i=1}^n |U_{ii}|^2 \stackrel{(a)}{\leq} \left(\sum_{i=1}^n U_{ii}\right)^2 \stackrel{(b)}{\leq} ((\sigma_{\max}^2)^2 d)^2, \quad (82)$$

where (a) follows from  $\mathbf{U}$  being positive semi-definite (all diagonal elements are nonnegative), and (b) follows from (81). Therefore, by (76)-(82), we have

$$\mathbb{P}\left\{\eta^\top \mathbf{U}\eta \geq 2s \cdot (\sigma_{\max}^2)^2 d + 2(\sigma_{\max}^2)^2 d\right\} \quad (83)$$

$$\leq C_1 \cdot \exp(-C_2 \sqrt{s}). \quad (84)$$

By choosing  $s = \left(\frac{1}{C_2} \ln \frac{C_1}{\delta}\right)^2$ , we have

$$\mathbb{P}\left\{\eta^\top \mathbf{U}\eta \geq 2(\sigma_{\max}^2)^2 d \left(\left(\frac{1}{C_2} \ln \frac{C_1}{\delta}\right)^2 + 1\right)\right\} \leq \delta. \quad (85)$$

Therefore, we conclude that with probability at least  $1 - \delta$ , the following inequality holds

$$\|\mathbf{X}(f^{-1}(\varepsilon \circ \varepsilon) - \mathbf{X}\phi_*)\|_{\mathbf{V}^{-1}} \quad (86)$$

$$\leq \frac{1}{M_f} \sqrt{2(\sigma_{\max}^2)^2 \cdot d \left( \left( \frac{1}{C_2} \ln \frac{C_1}{\delta} \right)^2 + 1 \right)}. \quad (87)$$

□

### A.3. Proof of Lemma 4

We first introduce a useful lemma.

**Lemma A.4 (Theorem 4.1 in (Tropp, 2012))** Consider a finite sequence  $\{\mathbf{A}_k\}$  of fixed self-adjoint matrices of dimension  $d \times d$ , and let  $\{\gamma_k\}$  be a finite sequence of independent standard normal variables. Let  $\sigma^2 = \|\sum_k \mathbf{A}_k^2\|_2$ . Then, for all  $s \geq 0$ ,

$$\mathbb{P}\left\{ \lambda_{\max}\left(\sum_k \gamma_k \mathbf{A}_k\right) \geq s \right\} \leq d \cdot \exp\left(-\frac{s^2}{2\sigma^2}\right), \quad (88)$$

where  $\lambda_{\max}(\cdot)$  denotes the largest eigenvalue of a square matrix.

Now we are ready to prove Lemma 4.

*Proof of Lemma 4.* To simplify notation, we use  $\mathbf{X}$  and  $\mathbf{V}$  as a shorthand for  $\mathbf{X}_n$  and  $\mathbf{V}_n$ , respectively. Recall that  $\mathbf{V}^{-1/2} \mathbf{X}^\top = [v_1, v_2, \dots, v_n]$  and define  $\mathbf{A}_i = v_i v_i^\top$ , for all  $i = 1, \dots, n$ . Note that  $\mathbf{A}_i$  is symmetric, for all  $i$ . Define an  $n \times n$  diagonal matrix  $\mathbf{D} = \text{diag}(\varepsilon_1, \varepsilon_2, \dots, \varepsilon_n)$ . Then we have:

$$\|\mathbf{X}^\top(\varepsilon \circ (\mathbf{X}(\theta_* - \hat{\theta})))\|_{\mathbf{V}^{-1}} \quad (89)$$

$$= \|\mathbf{V}^{-1/2} \mathbf{X}^\top(\varepsilon \circ (\mathbf{X}(\theta_* - \hat{\theta})))\|_2 \quad (90)$$

$$= \|\mathbf{V}^{-1/2} \mathbf{X}^\top \mathbf{D} \mathbf{X}(\theta_* - \hat{\theta})\|_2 \quad (91)$$

$$= \|\mathbf{V}^{-1/2} \mathbf{X}^\top \mathbf{D} \mathbf{X} \mathbf{V}^{-1/2} \mathbf{V}^{1/2}(\theta_* - \hat{\theta})\|_2 \quad (92)$$

$$\leq \|\mathbf{V}^{-1/2} \mathbf{X}^\top \mathbf{D} \mathbf{X} \mathbf{V}^{-1/2}\|_2 \cdot \|\mathbf{V}^{1/2}(\theta_* - \hat{\theta})\|_2 \quad (93)$$

$$= \|\mathbf{V}^{-1/2} \mathbf{X}^\top \mathbf{D} \mathbf{X} \mathbf{V}^{-1/2}\|_2 \cdot \|\theta_* - \hat{\theta}\|_{\mathbf{V}}. \quad (94)$$

Next, the first term in (94) can be expanded into

$$\|\mathbf{V}^{-1/2} \mathbf{X}^\top \mathbf{D} \mathbf{X} \mathbf{V}^{-1/2}\|_2 \quad (95)$$

$$= \left\| \sum_{i=1}^n \varepsilon_i v_i v_i^\top \right\|_2 = \left\| \sum_{i=1}^n \frac{\varepsilon_i}{\sqrt{f(x_i^\top \phi_*)}} \cdot \left( \sqrt{f(x_i^\top \phi_*)} \mathbf{A}_i \right) \right\|_2. \quad (96)$$

Note that  $\frac{\varepsilon_i}{\sqrt{f(x_i^\top \phi_*)}}$  is a standard normal random variable, for all  $i$ . We also define a  $d \times d$  matrix  $\Sigma = \sum_{i=1}^n f(x_i^\top \phi_*) \mathbf{A}_i^2$ . Then, we have

$$\Sigma = \sum_{i=1}^n f(x_i^\top \phi_*) (v_i v_i^\top) (v_i v_i^\top) \quad (97)$$

$$= \sum_{i=1}^n f(x_i^\top \phi_*) \|v_i\|_2^2 v_i v_i^\top. \quad (98)$$

We also know

$$\left\| \sum_{i=1}^n \mathbf{A}_i \right\|_2 = \left\| \sum_{i=1}^n v_i v_i^\top \right\|_2 \quad (99)$$

$$= \left\| \left( \mathbf{V}^{-1/2} \mathbf{X}^\top \right) \left( \mathbf{X} \mathbf{V}^{-1/2} \right) \right\|_2 \quad (100)$$

$$\leq \left\| \left( \mathbf{V}^{-1/2} \mathbf{X}^\top \right) \right\|_2 \left\| \left( \mathbf{X} \mathbf{V}^{-1/2} \right) \right\|_2 \leq 1, \quad (101)$$

where (101) follows from Lemma A.2. Moreover, we know

$$\|\Sigma\|_2 = \left\| \sum_{i=1}^n f(x_i^\top \phi_*) \|v_i\|_2^2 v_i v_i^\top \right\|_2 \quad (102)$$

$$\leq \left\| d \cdot \sigma_{\max}^2 \sum_{i=1}^n v_i v_i^\top \right\|_2 \quad (103)$$

$$= d \cdot \sigma_{\max}^2 \left\| \sum_{i=1}^n \mathbf{A}_i \right\|_2 \leq d \cdot \sigma_{\max}^2, \quad (104)$$

where (103) follows from Lemma A.2-A.3,  $f(x_i^\top \phi_*) \leq \sigma_{\max}^2$ , and that  $v_i v_i^\top$  is positive semi-definite, and the last inequality follows directly from (101). By Lemma A.4 and the fact that  $\varepsilon(x_1), \dots, \varepsilon(x_n)$  are mutually independent given the contexts  $\{x_i\}_{i=1}^n$ , we know that

$$\mathbb{P}\left\{ \lambda_{\max}\left(\sum_{i=1}^n \varepsilon_i \mathbf{A}_i\right) \geq \sqrt{2\|\Sigma\|_2} s \right\} \leq d \cdot e^{-s}. \quad (105)$$

Therefore, by choosing  $s = \ln(d/\delta)$  and the fact that  $\lambda_{\max}\left(\sum_{i=1}^n \varepsilon_i \mathbf{A}_i\right) = \|\sum_{i=1}^n \varepsilon_i \mathbf{A}_i\|_2$ , we obtain

$$\mathbb{P}\left\{ \left\| \sum_{i=1}^n \varepsilon_i \mathbf{A}_i \right\|_2 \geq \sqrt{2\sigma_{\max}^2 d \ln\left(\frac{d}{\delta}\right)} \right\} \leq \delta. \quad (106)$$

Finally, by applying Lemma 1 and (106) to (94), we conclude that for any  $n \in \mathbb{N}$ , for any  $\delta > 0$ , with probability at least  $1 - \delta$ , we have

$$\|\mathbf{X}_n^\top(\varepsilon \circ \mathbf{X}_n(\theta_* - \hat{\theta}_n))\|_{\mathbf{V}_n^{-1}} \leq \alpha_n^{(1)}(\delta) \cdot \alpha^{(3)}(\delta). \quad (107)$$

□

#### A.4. Proof of Lemma 5

We first introduce a useful lemma on the norm of the Hadamard product of two matrices.

**Lemma A.5** *Given any two matrices  $\mathbf{A}$  and  $\mathbf{B}$  of the same dimension, the following holds:*

$$\|\mathbf{A} \circ \mathbf{B}\|_F \leq \text{tr}(\mathbf{A}\mathbf{B}^\top) \leq \|\mathbf{A}\|_2 \cdot \|\mathbf{B}\|_2, \quad (108)$$

where  $\|\cdot\|$  denotes the Frobenius norm. When  $\mathbf{A}$  and  $\mathbf{B}$  are vectors, the above degenerates to

$$\|\mathbf{A} \circ \mathbf{B}\|_2 \leq \|\mathbf{A}\|_2 \cdot \|\mathbf{B}\|_2. \quad (109)$$

*Proof of Lemma 5.* To simplify notation, we use  $\mathbf{X}$  and  $\mathbf{V}$  as a shorthand for  $\mathbf{X}_n$  and  $\mathbf{V}_n$ , respectively. Let  $\mathbf{M}$  be a positive definite matrix. We have

$$\|\mathbf{A}v\|_{\mathbf{M}} = \left\| \mathbf{M}^{1/2} \mathbf{A}v \right\|_2 \leq \left\| \mathbf{M}^{1/2} \mathbf{A} \right\|_2 \cdot \|v\|_2, \quad (110)$$

where the last inequality holds since  $\ell_2$ -norm is sub-multiplicative. Meanwhile, we also observe that

$$(\theta_* - \hat{\theta})^\top \mathbf{X}^\top \mathbf{X} (\theta_* - \hat{\theta}) \quad (111)$$

$$= (\theta_* - \hat{\theta})^\top \mathbf{V}^{1/2} \mathbf{V}^{-1/2} \mathbf{X}^\top \mathbf{X} \mathbf{V}^{-1/2} \mathbf{V}^{1/2} (\theta_* - \hat{\theta}) \quad (112)$$

$$= \left\| (\theta_* - \hat{\theta})^\top \mathbf{V}^{1/2} \mathbf{V}^{-1/2} \mathbf{X}^\top \right\|_2^2 \quad (113)$$

$$\leq \left\| (\theta_* - \hat{\theta})^\top \mathbf{V}^{1/2} \right\|_2^2 \left\| \mathbf{V}^{-1/2} \mathbf{X}^\top \right\|_2^2 \quad (114)$$

$$\leq \left\| \theta_* - \hat{\theta} \right\|_{\mathbf{V}}^2. \quad (115)$$

Therefore, we know

$$\left\| \mathbf{X}^\top (\mathbf{X} (\theta_* - \hat{\theta}) \circ \mathbf{X} (\theta_* - \hat{\theta})) \right\|_{\mathbf{V}^{-1}} \quad (116)$$

$$\leq \left\| \mathbf{V}^{-1/2} \mathbf{X}^\top \right\|_2 \left\| (\mathbf{X} (\theta_* - \hat{\theta}) \circ \mathbf{X} (\theta_* - \hat{\theta})) \right\|_2 \quad (117)$$

$$\leq 1 \cdot \left\| \mathbf{X} (\theta_* - \hat{\theta}) \right\|_2^2 \quad (118)$$

$$\leq 1 \cdot \left( (\theta_* - \hat{\theta})^\top \mathbf{X}^\top \mathbf{X} (\theta_* - \hat{\theta}) \right) \quad (119)$$

$$\leq \left\| \theta_* - \hat{\theta} \right\|_{\mathbf{V}}^2 \leq (\alpha_n^{(1)}(\delta))^2, \quad (120)$$

where (118) follows from Lemma A.2 and A.5, and (120) follows from Lemma 1. The proof is complete.  $\square$

#### A.5. Proof of Theorem 2

Recall that  $h_\beta(u, v) = \left( \Phi\left(\frac{\beta-u}{\sqrt{f(v)}}\right) \right)^{-1}$ . We first need the following lemma about Lipschitz smoothness of the function  $h_\beta(u, v)$ .

**Lemma A.6** *The function  $h_\beta(u, v)$  defined in (31) is (uniformly) Lipschitz smooth on its domain, i.e., there exists a finite  $M_h > 0$  ( $M_h$  is independent of  $u, v$ , and  $\beta$ ) such that for any  $\beta$  with  $|\beta| \leq B$ , for any  $u_1, u_2 \in [-1, 1]$  and  $v_1, v_2 \in [\sigma_{\min}^2, \sigma_{\max}^2]$ ,*

$$|\nabla h_\beta(u_1, v_1) - \nabla h_\beta(u_2, v_2)| \leq M_h \left\| \begin{pmatrix} u_1 \\ v_1 \end{pmatrix} - \begin{pmatrix} u_2 \\ v_2 \end{pmatrix} \right\|_2. \quad (121)$$

Moreover, we have

$$h_\beta(u_2, v_2) - h_\beta(u_1, v_1) \leq \quad (122)$$

$$\left( \begin{pmatrix} u_2 - u_1 \\ v_2 - v_1 \end{pmatrix}^\top \nabla h_\beta(u_1, v_1) + \frac{M_h}{2} \left\| \begin{pmatrix} u_2 - u_1 \\ v_2 - v_1 \end{pmatrix} \right\|_2^2 \right). \quad (123)$$

*Proof of Lemma A.6.* First, it is easy to verify that  $h_\beta(\cdot, \cdot)$  is twice continuously differentiable on its domain  $[-1, 1] \times [\sigma_{\min}^2, \sigma_{\max}^2]$  and therefore is Lipschitz smooth, for some finite positive constant  $M_h$ . To show that there exists an  $M_h$  that is independent of  $u, v, \beta$ , we need to consider the gradient and Hessian of  $h_\beta(\cdot, \cdot)$ . Since  $h_\beta(u, v)$  is a composite function that involves  $\Phi(\cdot)$  and  $f(\cdot)$ , it is straightforward to write down the first and second derivatives of  $h_\beta(u, v)$  with respect to  $u$  and  $v$ , which depend on  $\Phi(\cdot), \Phi'(\cdot), \Phi''(\cdot), f(\cdot), f'(\cdot)$ , and  $f''(\cdot)$ . Given the facts that for all the  $u, v$  and  $\beta$  in the domain of interest, we have  $\Phi\left(\frac{\beta-u}{v}\right) \in \left[\Phi\left(\frac{-B-1}{\sigma_{\min}^2}\right), 1\right]$ ,  $\Phi'\left(\frac{\beta-u}{v}\right) \in (0, \frac{1}{\sqrt{2\pi}})$ ,  $|\Phi''\left(\frac{\beta-u}{v}\right)| \leq \frac{B+1}{\sigma_{\min}\sqrt{2\pi}}$ , and that  $f(\cdot), f'(\cdot), f''(\cdot)$  are all bounded, it is easy to verify that such an  $M_h$  indeed exists by substituting the above conditions into the first and second derivatives of  $h_\beta(u, v)$  with respect to  $u$  and  $v$ . Moreover, by Lemma 3.4 in (Bubeck et al., 2015), we know that (123) indeed holds.  $\square$

*Proof of Theorem 2.* Define

$$q_u := \sup_{u_0 \in (-1, 1)} \left| \frac{\partial h_\beta}{\partial u} \right|_{u=u_0}, \quad (124)$$

$$q_v := \sup_{v_0 \in (\sigma_{\min}^2, \sigma_{\max}^2)} \left| \frac{\partial h_\beta}{\partial v} \right|_{v=v_0}. \quad (125)$$

By the discussion in the proof of Lemma A.6, we know that  $q_u$  and  $q_v$  are both positive real numbers. By substituting  $u_1 = \theta_1^\top x, u_2 = \theta_2^\top x, v_1 = f(\phi_1^\top x)$ , and  $v_2 = f(\phi_2^\top x)$  into (123), we have

$$h_\beta(\theta_2^\top x, \phi_2^\top x) - h_\beta(\theta_1^\top x, \phi_1^\top x) \quad (126)$$

$$\leq \left( \begin{pmatrix} (\theta_2 - \theta_1)^\top x \\ f(\phi_2^\top x) - f(\phi_1^\top x) \end{pmatrix}^\top \nabla h_\beta(\theta_1^\top x, f(\phi_1^\top x)) \right) \quad (127)$$

$$+ \frac{M_h}{2} \left\| \begin{pmatrix} (\theta_2 - \theta_1)^\top x \\ f(\phi_2^\top x) - f(\phi_1^\top x) \end{pmatrix} \right\|_2^2 \quad (128)$$

$$\leq (q_u \|\theta_2 - \theta_1\|_{\mathbf{M}} \cdot \|x\|_{\mathbf{M}^{-1}}) \quad (129)$$

$$+ q_v M_f \|\phi_2 - \phi_1\|_{\mathbf{M}} \cdot \|x\|_{\mathbf{M}^{-1}}) \quad (130)$$

$$+ \frac{M_h}{2} (\|\theta_2 - \theta_1\|_{\mathbf{M}}^2 + M_f^2 \|\phi_2 - \phi_1\|_{\mathbf{M}}^2) \cdot \|x\|_{\mathbf{M}^{-1}} \quad (131)$$

$$\leq (q_u + M_h) \|\theta_2 - \theta_1\|_{\mathbf{M}} \cdot \|x\|_{\mathbf{M}^{-1}} \quad (132)$$

$$+ M_f (q_v + M_h M_f L) \|\phi_2 - \phi_1\|_{\mathbf{M}} \cdot \|x\|_{\mathbf{M}^{-1}}, \quad (133)$$

where (130)-(131) follow from the Cauchy-Schwarz inequality and the fact that  $f(\cdot)$  is Lipschitz continuous, and (132)-(133) follow from the facts that  $\|x\|_2 \leq 1$ ,  $\|\theta_2 - \theta_1\|_2 \leq 2$ , and  $\|\phi_2 - \phi_1\|_2 \leq 2L$ . By letting  $C_3 = q_u + M_h$  and  $C_4 = M_f(q_v + M_h M_f L)$ , we conclude (32)-(33) indeed holds with  $C_3$  and  $C_4$  being independent of  $\theta_1, \theta_2, \phi_1, \phi_2$ , and  $\beta$ .  $\square$

### A.6. Proof of Lemma 6

*Proof.* By Theorem 2 and (35), we know

$$Q_{t+1}^{\text{HR}}(x) - h_{\beta_{t+1}}(\theta_*^\top x, \phi_*^\top x) \quad (134)$$

$$= h_{\beta_{t+1}}(\hat{\theta}_t^\top x, \hat{\phi}_t^\top x) + \xi_t(\delta) \|x\|_{\mathbf{V}_t^{-1}} - h_{\beta_{t+1}}(\theta_*^\top x, \phi_*^\top x) \quad (135)$$

$$\leq 2\xi_t(\delta) \|x\|_{\mathbf{V}_t^{-1}}. \quad (136)$$

Similarly, by switching the roles of  $\theta_*^\top, \phi_*^\top$  and  $\hat{\theta}_t^\top, \hat{\phi}_t^\top$  in (135), we have

$$Q_{t+1}^{\text{HR}}(x) - h_{\beta_{t+1}}(\theta_*^\top x, \phi_*^\top x) \geq 0. \quad (137)$$

$\square$

### A.7. Proof of Theorem 3

*Proof.* For each user  $t$ , let  $\pi_t^{\text{HR}} = \{x_{t,1}, x_{t,2}, \dots\}$  denote the action sequence under the HR-UCB policy. Under HR-UCB,  $\hat{\theta}_t$  and  $\hat{\phi}_t$  are updated only after the departure of each user. This fact implies that  $x_{t,i} = x_{t,j}$ , for all  $i, j$ . Therefore, we can use  $x_t$  to denote the action chosen by HR-UCB for the user  $t$ , to simplify notation. Let  $\bar{R}_t^{\text{HR}}$  denote the expected lifetime of user  $t$  under HR-UCB. Similar to (30), we have

$$\bar{R}_t^{\text{HR}} = \left( \Phi \left( \frac{\beta_t - \theta_*^\top x_t}{\sqrt{f(\hat{\phi}_*^\top x_t)}} \right) \right)^{-1} = h_{\beta_t}(\theta_*^\top x_t, \hat{\phi}_*^\top x_t). \quad (138)$$

Recall that  $\pi^{\text{oracle}}$  and  $x_t^*$  denote the oracle policy and the context of the action of the oracle policy for user  $t$ , respec-

tively. We compute the pseudo regret of HR-UCB as

$$\text{Regret}_T = \sum_{t=1}^T \bar{R}_t^* - \bar{R}_t^{\text{HR}} \quad (139)$$

$$= \sum_{t=1}^T h_{\beta_t}(\theta_*^\top x_t^*, \hat{\phi}_*^\top x_t^*) - h_{\beta_t}(\theta_*^\top x_t, \hat{\phi}_*^\top x_t). \quad (140)$$

To simplify notation, we use  $w_t$  as a shorthand for  $h_{\beta_t}(\theta_*^\top x_t^*, \hat{\phi}_*^\top x_t^*) - h_{\beta_t}(\theta_*^\top x_t, \hat{\phi}_*^\top x_t)$ . Given any  $\delta > 0$ , define an event  $E_\delta$  in which (12) and (17) hold under the given  $\delta$ , for all  $t \in \mathbb{N}$ . By Lemma 1 and Theorem 1, we know that the event  $E_\delta$  occurs with probability at least  $1 - 3\delta$ . Therefore, with probability at least  $1 - 3\delta$ , for all  $t \in \mathbb{N}$ ,

$$w_t \leq Q_t^{\text{HR}}(x_t^*) - h_{\beta_t}(\theta_*^\top x_t, \hat{\phi}_*^\top x_t) \quad (141)$$

$$\leq Q_t^{\text{HR}}(x_t) - h_{\beta_t}(\theta_*^\top x_t, \hat{\phi}_*^\top x_t) \quad (142)$$

$$= h_{\beta_t}(\theta_*^\top x_t, \hat{\phi}_*^\top x_t) + \xi_{t-1}(\delta) \|x_t\|_{\mathbf{V}_{t-1}^{-1}} \quad (143)$$

$$- h_{\beta_t}(\theta_*^\top x_t, \hat{\phi}_*^\top x_t) \quad (144)$$

$$\leq 2\xi_{t-1}(\delta) \cdot \|x_t\|_{\mathbf{V}_{t-1}^{-1}}, \quad (145)$$

where (141) and (143) follow directly from the definition of the UCB index, (142) follows from the design of HR-UCB algorithm, and (145) is a direct result under the event  $E_\delta$ . Now, we are ready to conclude that with probability at least  $1 - 3\delta$ , we have

$$\text{Regret}_T = \sum_{t=1}^T w_t \leq \sqrt{T \sum_{t=1}^T w_t^2} \quad (146)$$

$$\leq \sqrt{4\xi_T^2(\delta) T \sum_{t=1}^T \min\{\|x_t\|_{\mathbf{V}_{t-1}^{-1}}^2, 1\}} \quad (147)$$

$$\leq \sqrt{8\xi_T^2(\delta) T \cdot d \log \left( \frac{\mathcal{S}(T) + \lambda d}{\lambda d} \right)}, \quad (148)$$

where (146) follows from the Cauchy-Schwarz inequality, (147) follows from the fact that  $\xi_t(\delta)$  is an increasing function in  $t$ , and (148) follows from Lemma 10 and 11 in (Abbasi-Yadkori et al., 2011) and the fact that  $\mathbf{V}_t = \lambda \mathbf{I}_d + \mathbf{X}_t^\top \mathbf{X}_t = \lambda \mathbf{I}_d + \sum_{i=1}^t x_i x_i^\top$ . By substituting  $\xi_T(\delta)$  into (148) and using the fact that  $\mathcal{S}(T) \leq \Gamma(T)$ , we know

$$\text{Regret}_T = \mathcal{O} \left( \sqrt{T \log \Gamma(T)} \cdot \left( \log(\Gamma(T)) + \log\left(\frac{1}{\delta}\right) \right)^2 \right). \quad (149)$$

By choosing  $\Gamma(T) = KT$  for some constant  $K > 0$ , we thereby conclude that

$$\text{Regret}_T = \mathcal{O} \left( \sqrt{T \log T} \cdot \left( \log T + \log\left(\frac{1}{\delta}\right) \right)^2 \right). \quad (150)$$

The proof is complete.  $\square$
